# Supplementary material
Source: publisher figshare collection journal article supplement (https://frontiersin.figshare.com/ndownloader/files/31806515)
Supplement: Supplementary file [file 31806515]

## Overview of basic functionalities of the PRODEMOS app

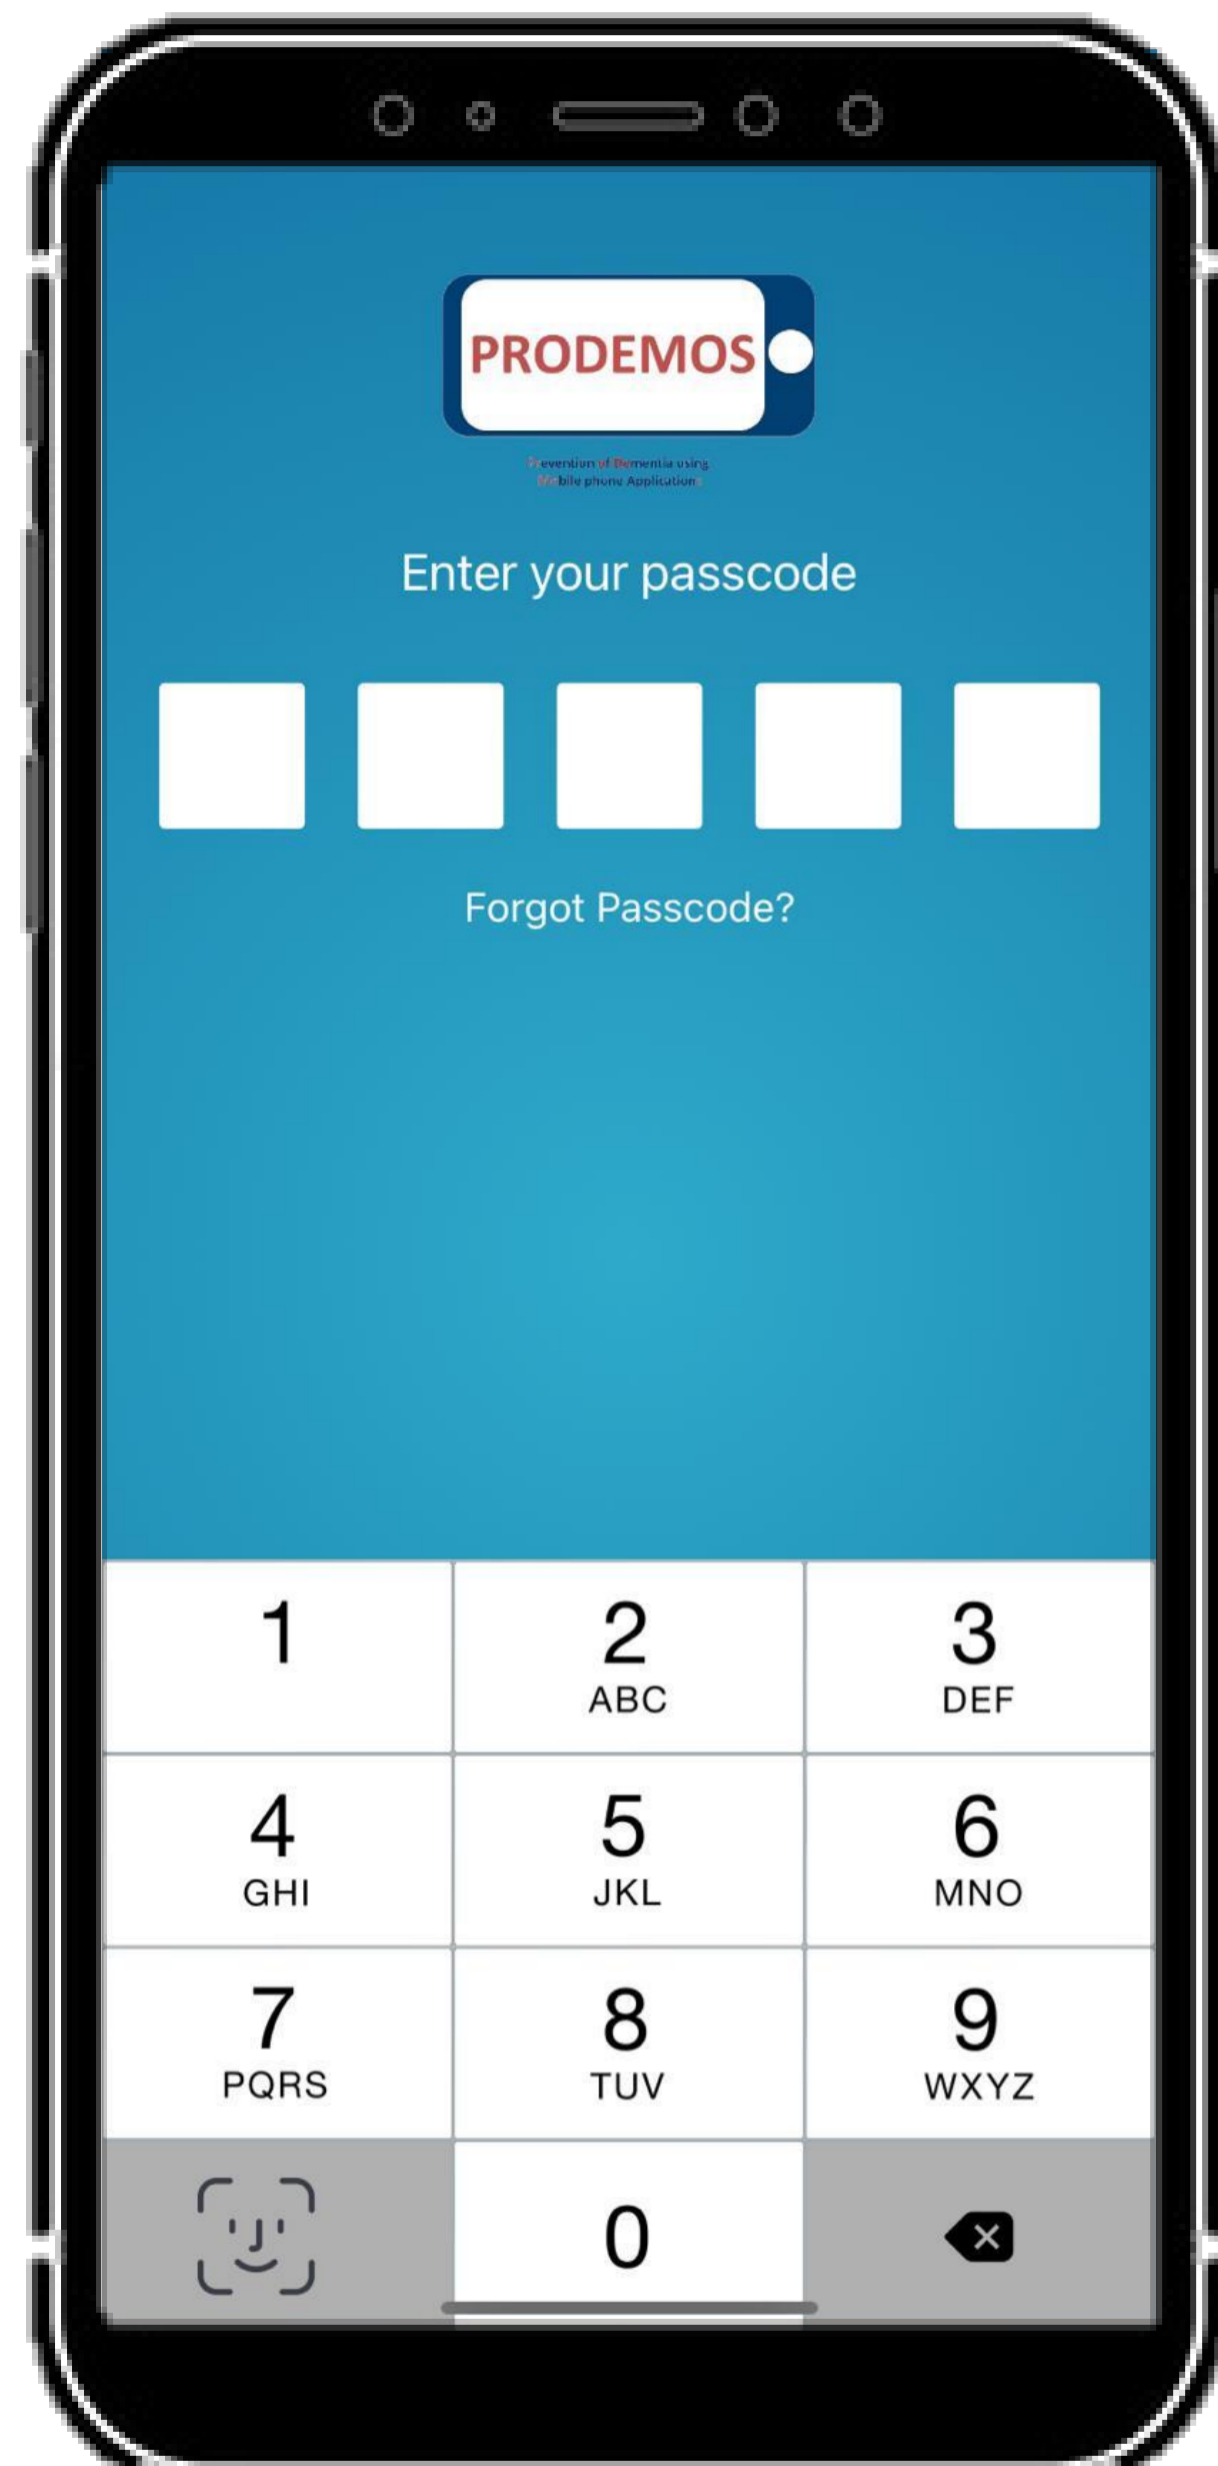

Log in

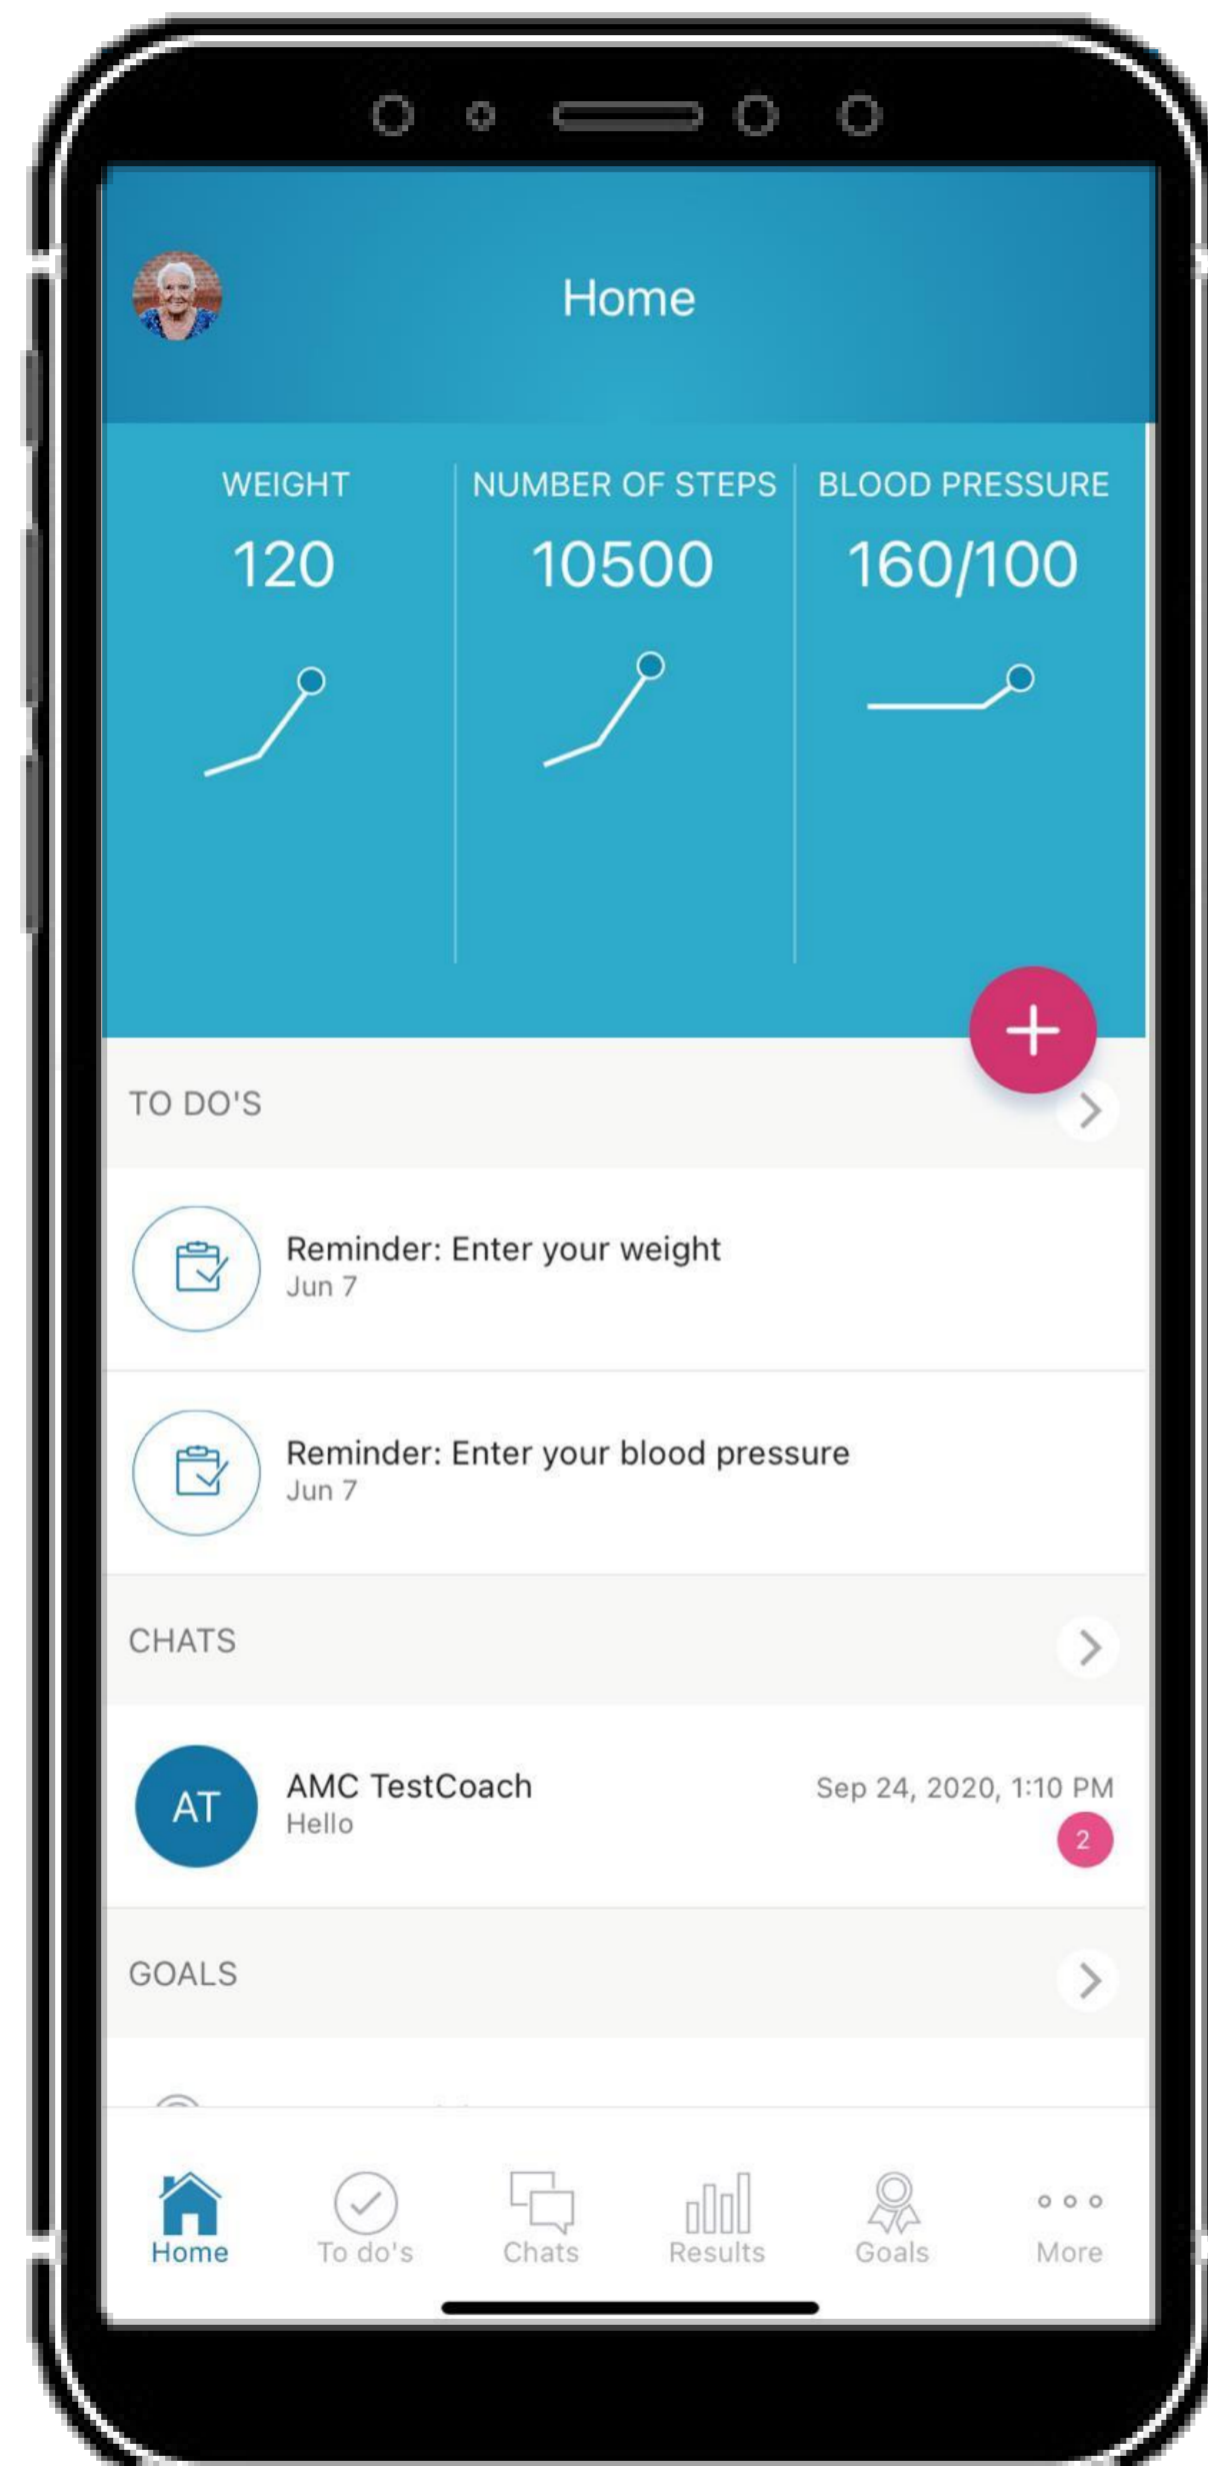

Dashboard

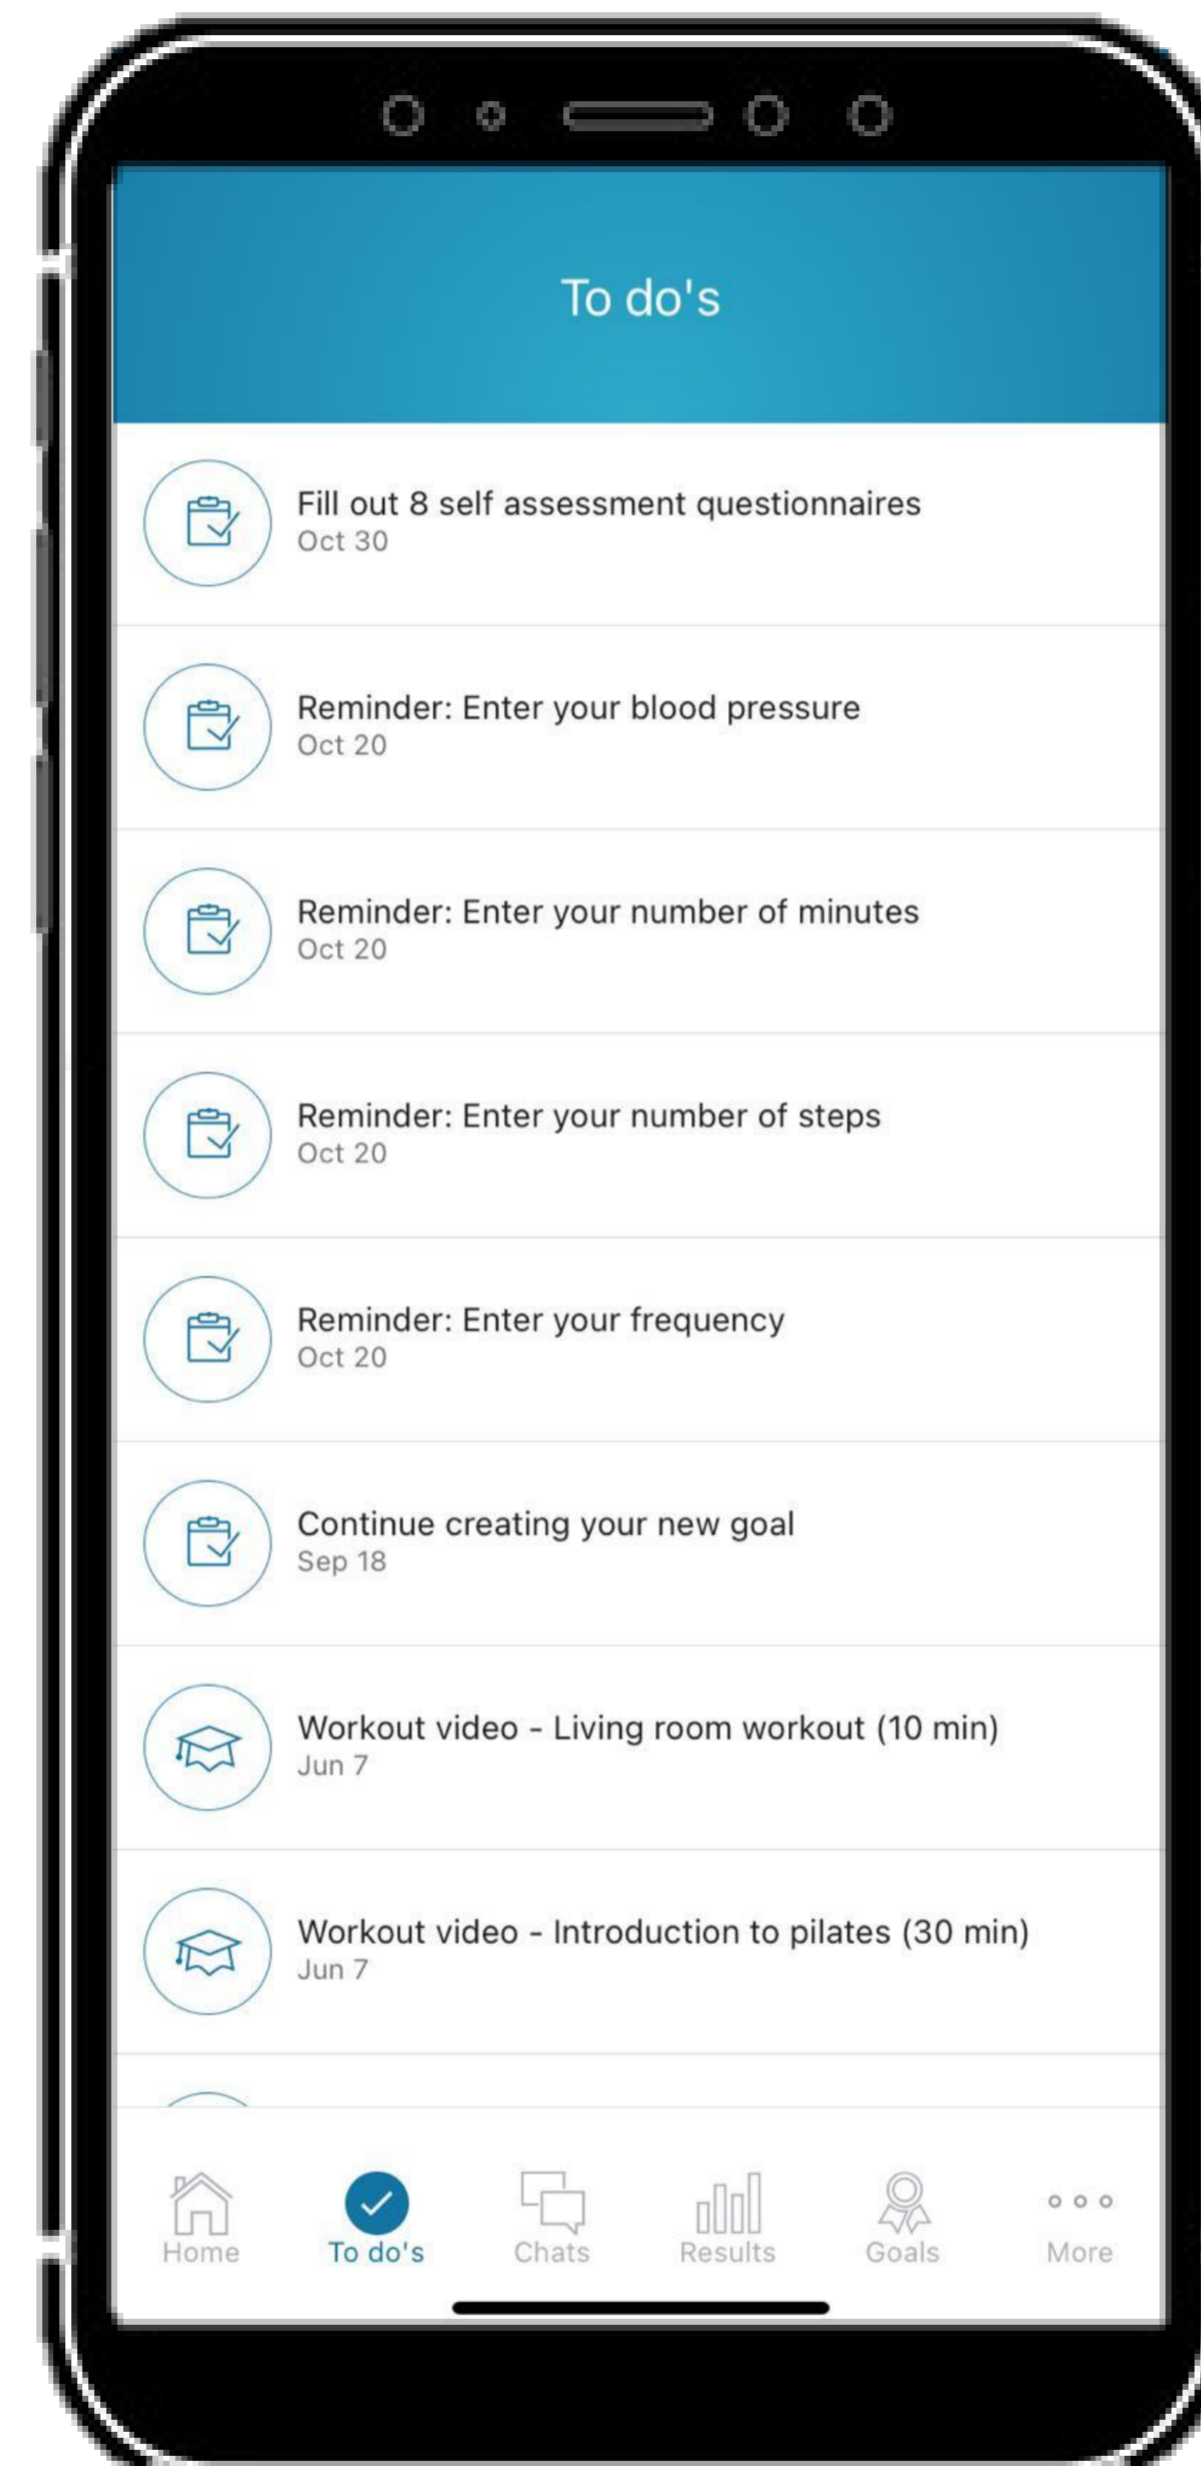

To Do's

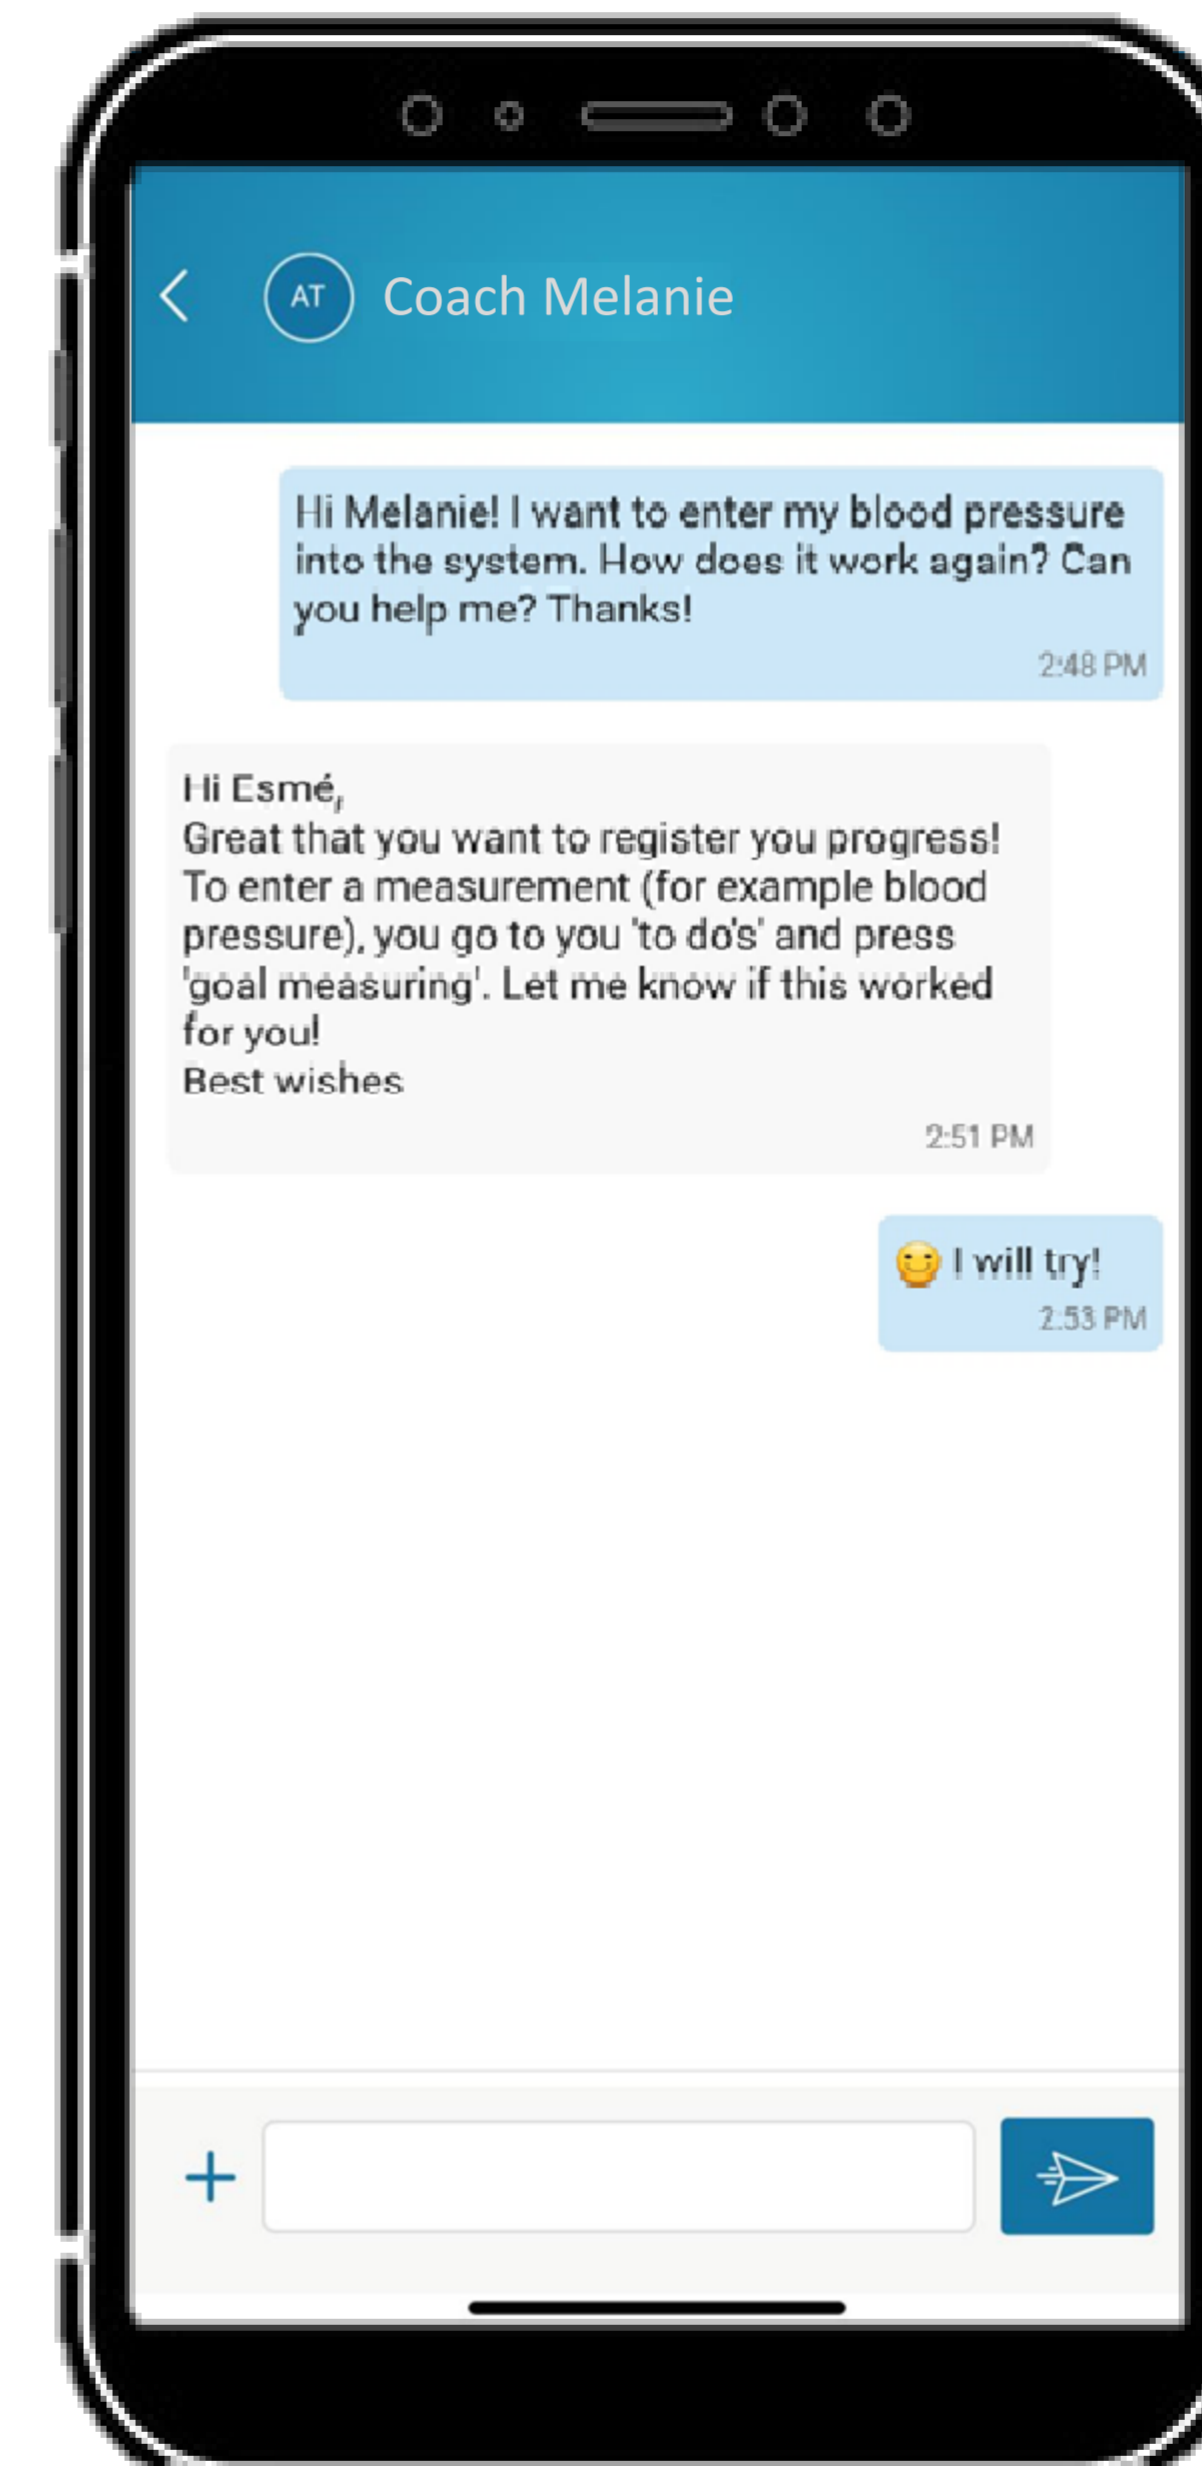

Chat

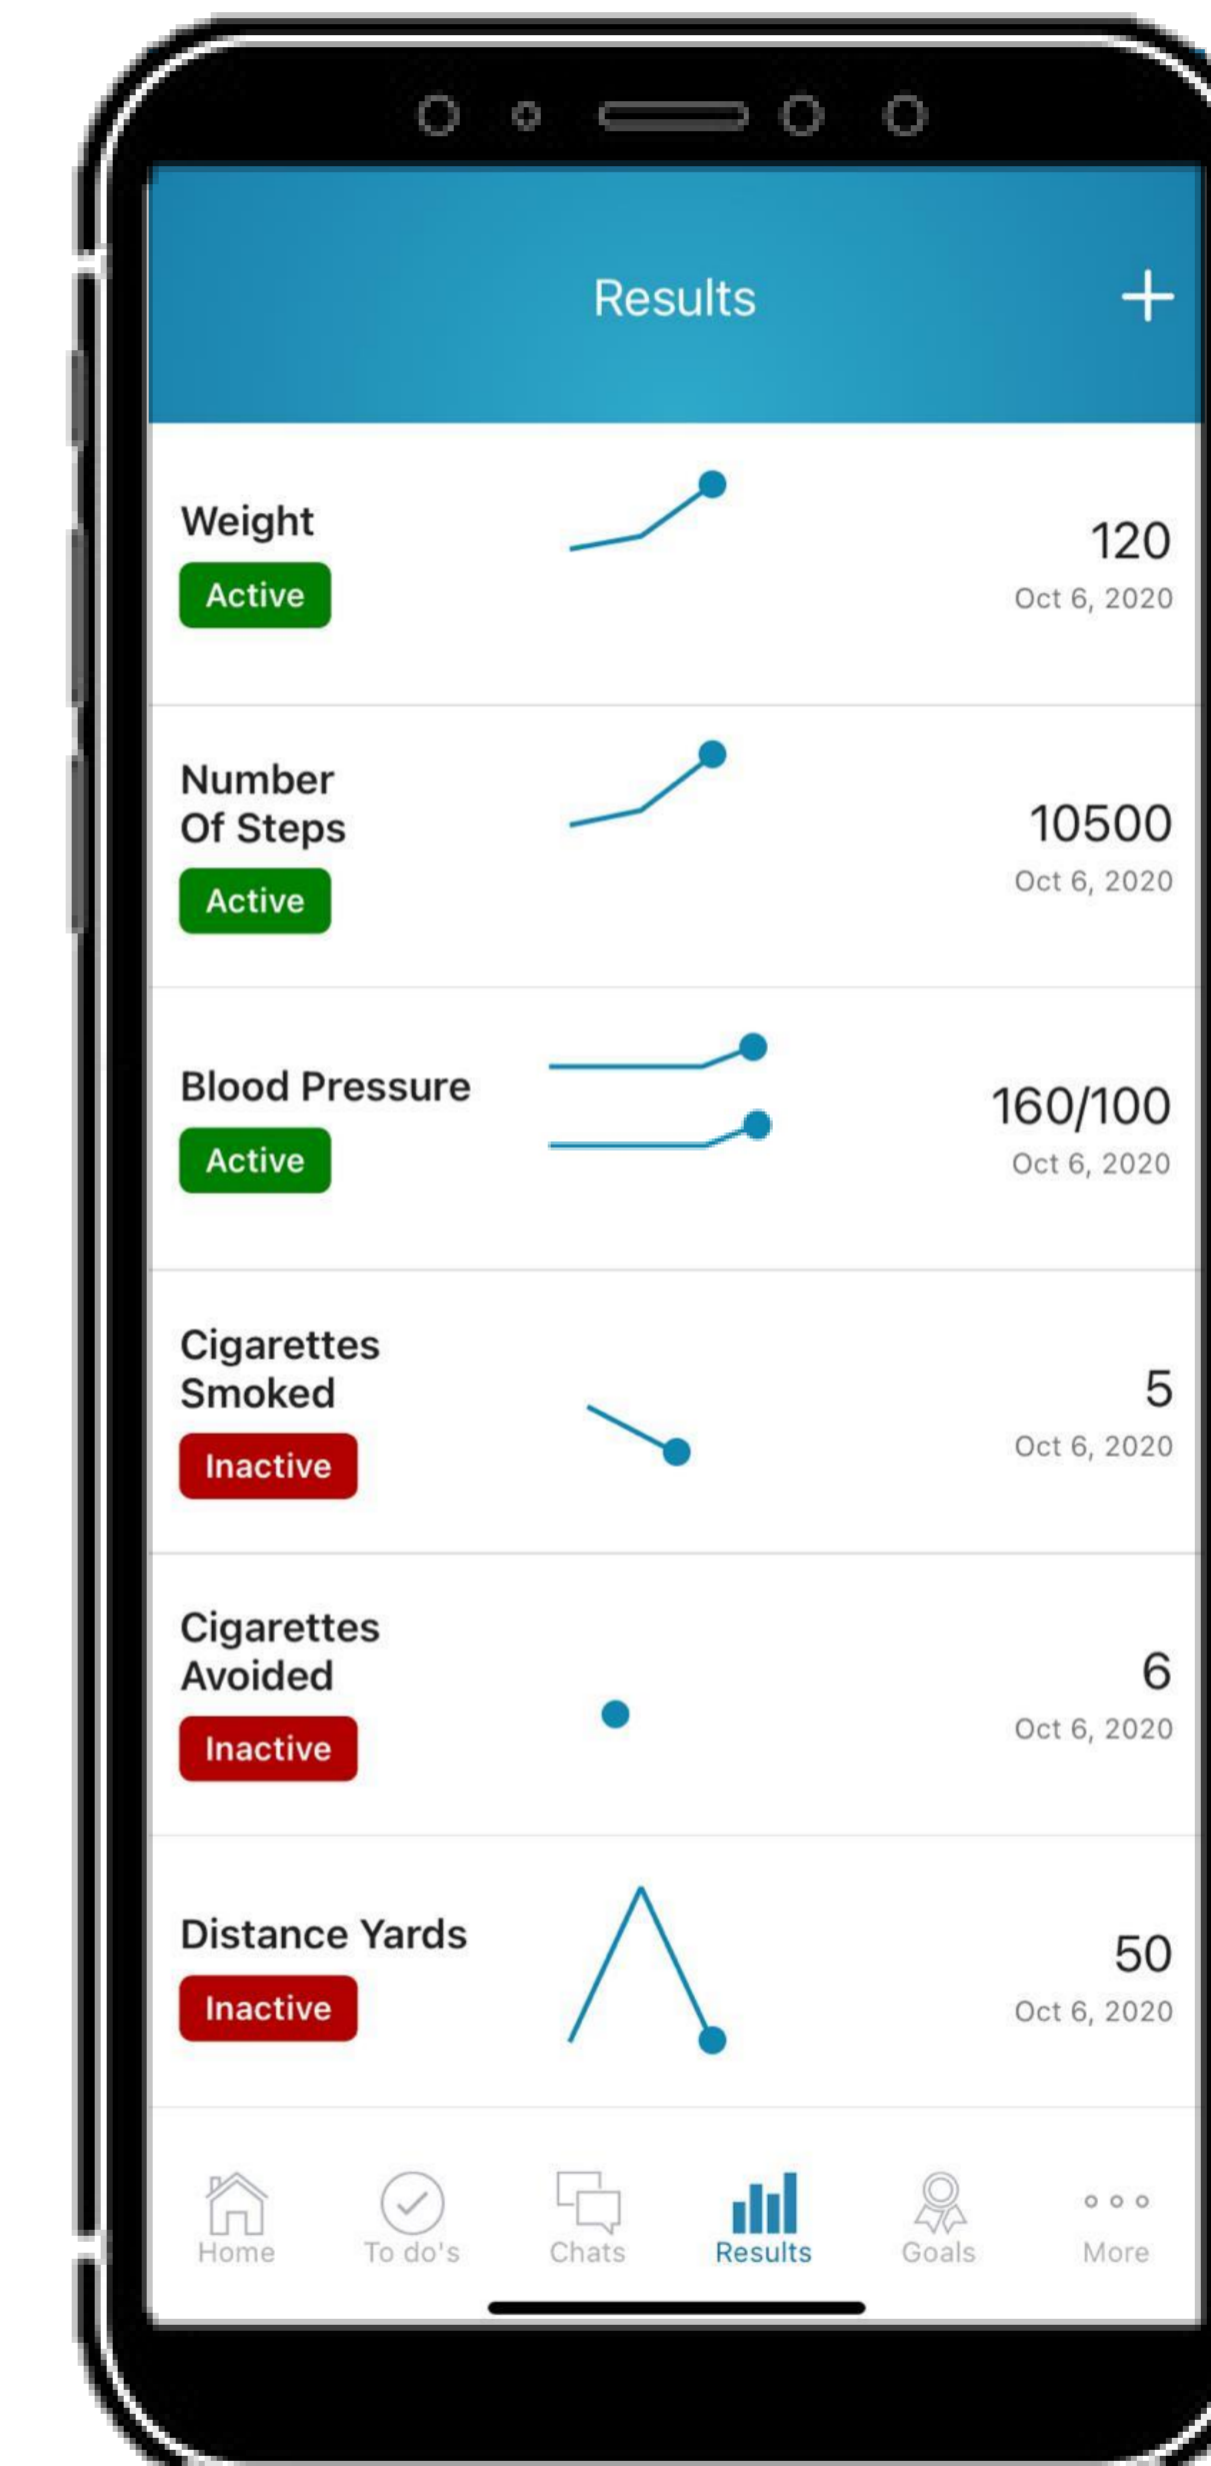

Result page

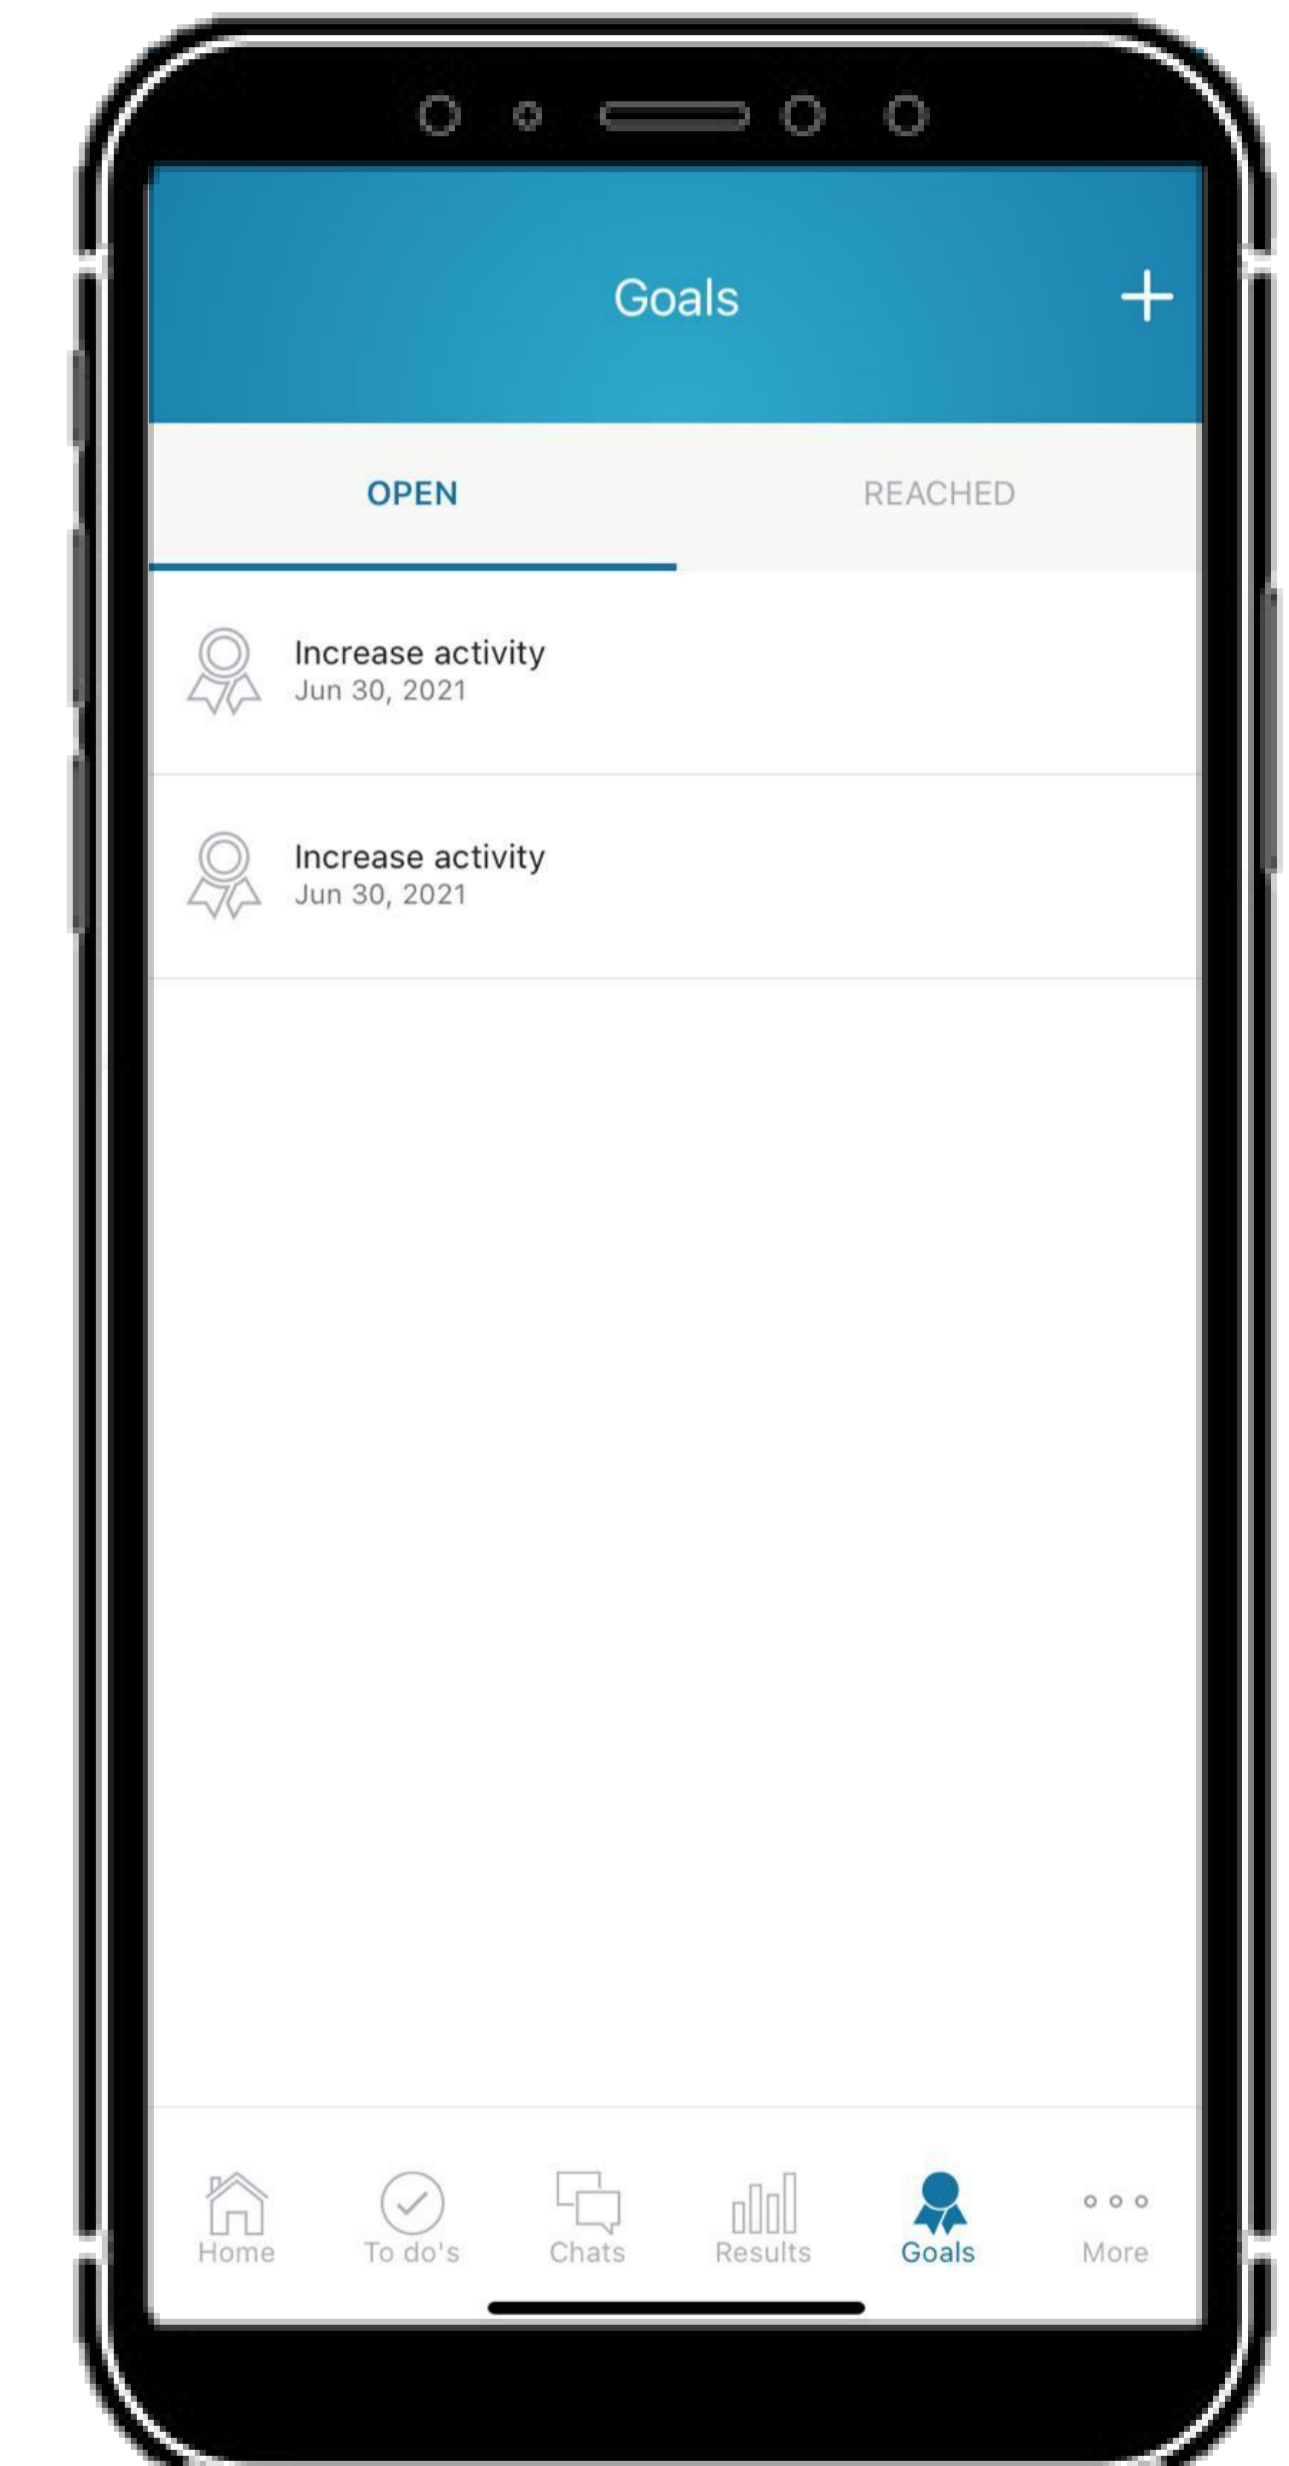

Goals
